# Supplementary material for: Nitrogen Removal Characteristics and Constraints of an Alphaproteobacteria with Potential for High Nitrogen Content Heterotrophic Nitrification-Aerobic Denitrification
Source: MDPI journal article supplement (doi:10.3390/microorganisms10020235), 2022-01-21
Supplement: s1 [file s1]

**Table S1.** Primer pairs related to aerobic denitrification gene amplification.

| Gene                                                    | Primer (5'-3')                               | References |
|---------------------------------------------------------|----------------------------------------------|------------|
| <i>narG(Z)</i>                                          | GAAGACCGCGGCTGGGAAGA                         | This study |
|                                                         | CCTTGCCGCCGAAATAGGGG                         |            |
| <i>narG(H)</i>                                          | GCGCTCAAATCGGCATGGTG                         | This study |
|                                                         | GCTTGGACGCGCCGAAGA                           |            |
| <i>napA</i>                                             | TCTGGACCATGGGCTTCAACCA                       | [1-5]      |
|                                                         | ACGACGACCGGCCAGCGCAG                         |            |
| <i>nirS</i>                                             | CCTAYTGGCCGCCRCART                           | [6,7]      |
|                                                         | CGTTGAACTTRCCGGT                             |            |
| <i>nirK</i>                                             | ATCATGGT (C/G) CTGCCGCG                      | [6,8,9]    |
|                                                         | GCCTCGATC (A/G) AGTTGTGGTT-3'                |            |
| <i>norB</i>                                             | CG (N) GA (R) TT (Y) CT (S) GA (R) CA (R) CC | [10]       |
|                                                         | C (R) TA (D) GC (V) CCR (W) AGAA (V) GC      |            |
| <i>nosZ</i>                                             | CGYTGTTCMTGACAGCCAG                          | [11,12]    |
|                                                         | CGSACCTTSTTGCCSTYGCG                         |            |
| R=A/G, Y=C/T, S=C/G, W=A/T, V=A/C/G, D=A/G/T, N=A/C/G/T |                                              |            |

## Reference

1. Tinglin, H., et al., Nitrogen-removal efficiency of a novel aerobic denitrifying bacterium, *Pseudomonas stutzeri* strain ZF31, isolated from a drinking-water reservoir. *Bioresource technology*, 2015. 196.
2. Huang, X., et al., Ammonium removal by a novel oligotrophic *Acinetobacter* sp. Y16 capable of heterotrophic nitrification-aerobic denitrification at low temperature. *Bioresour Technol*, 2013. 146: p. 44-50.
3. Kong, Q.X., et al., Development and application of a novel and effective screening method for aerobic denitrifying bacteria. *FEMS Microbiol Lett*, 2006. 260(2): p. 150-5.
4. Bell, L.C., D.J. Richardson, and S.J. Ferguson, Periplasmic and membrane-bound respiratory nitrate reductases in *Thiosphaera pantotropha*. The periplasmic enzyme catalyzes the first step in aerobic denitrification. *FEBS Lett*, 1990. 265(1-2): p. 85-7.
5. Bell, L.C., et al., Insertion of transposon Tn5 into a structural gene of the membrane-bound nitrate reductase of *Thiosphaera pantotropha* results in anaerobic overexpression of periplasmic nitrate reductase activity. *J Gen Microbiol*, 1993. 139(12): p. 3205-14.
6. Braker, G., A. Fesefeldt, and K.P. Witzel, Development of PCR primer systems for amplification of nitrite reductase genes (*nirK* and *nirS*) to detect denitrifying bacteria in environmental samples. *Appl Environ Microbiol*, 1998. 64(10): p. 3769-75.
7. Velusamy, K. and K.K. Krishnani, Heterotrophic nitrifying and oxygen tolerant denitrifying bacteria from greenwater system of coastal aquaculture. *Appl Biochem Biotechnol*, 2013. 169(6): p. 1978-92.
8. Wang, Q., et al., Effects of the nitrification inhibitor dicyandiamide (DCD) on N<sub>2</sub> Omissions and the abundance of nitrifiers and denitrifiers in two contrasting agricultural soils. *Journal of Soils and Sediments*, 2017. 17(6).
9. Fang, F., S. Chen, and G. Xu, Investigation of Denitrifying Bacteria Communities in Fresh and Aged Municipal Solid Waste Using Nitrite Reductase Genes. *Environmental Engineering Science*, 2010. 27(11): p. 931-938.
10. Wan, C., et al., Aerobic denitrification by novel isolated strain using NO<sub>2</sub>-(2)-N as nitrogen source. *Bioresour Technol*, 2011. 102(15): p. 7244-8.
11. Li, X., et al., Characteristics of biofilms and iron corrosion scales with ground and surface waters in drinking water distribution systems. *Corrosion Science*, 2015. 90.
12. Veraart, A.J., et al., Denitrification in restored and unrestored Danish streams. *Ecological Engineering*, 2014. 66.
